# Supplementary material for: Relationships between community social capital and injury in Canadian adolescents: a multilevel analysis
Source: PubMed Central journal article supplement — Inj Prev. 2015 Aug 20;21(6):389–96. doi: 10.1136/injuryprev-2015-041552 (PMC4717402; doi:10.1136/injuryprev-2015-041552), 2015-08-20
Supplement: injuryprev-2015-041552-s1.pdf [file injuryprev-2015-041552-s1.pdf]

### Appendix table 1: Questions for Measurement of Social Capital

| <i>Please say how you feel about these statements about the area where you live.</i>              |                    |
|---------------------------------------------------------------------------------------------------|--------------------|
| <b>Response options:</b>                                                                          |                    |
| Strongly disagree                                                                                 |                    |
| Disagree                                                                                          |                    |
| Neither agree nor disagree,                                                                       |                    |
| Agree                                                                                             |                    |
| Strongly agree                                                                                    |                    |
| <b>Item</b>                                                                                       | <b>Measure for</b> |
| People say 'hello' and often stop to talk to each other in the street                             | Social Cohesion    |
| It is safe for younger children to play outside during the day                                    | Social Cohesion    |
| There are good places to spend your free time (e.g., recreation centres, parks, shopping centres) | Social Cohesion    |
| You can trust people around here                                                                  | Trust              |
| I could ask for help or a favour from neighbours                                                  | Cooperation        |

**Appendix table 2. Factor pattern matrix of risk taking behaviour items**

| <b>Item</b>               | <b>Loading</b> |
|---------------------------|----------------|
| Using cannabis            | 0.91           |
| Smoking tobacco           | 0.88           |
| Bing drinking             | 0.77           |
| Every have had sex        | 0.74           |
| <b>Variance explained</b> |                |
| 67.8%                     |                |
| <b>Cronbach Alpha</b>     |                |
| 0.78                      |                |
| <b>Eigenvalue</b>         |                |
| 1.43                      |                |

**Appendix table 3. Factor pattern matrix of peer influence items**

| <b>Loadings to the negative peer influence factor</b> |                | <b>Loadings to the positive peer influence factor</b>     |                |
|-------------------------------------------------------|----------------|-----------------------------------------------------------|----------------|
| <b>Item</b>                                           | <b>Loading</b> | <b>Item</b>                                               | <b>Loading</b> |
| <i>Most of the friends in my group....</i>            |                | <i>Most of the friends in my group....</i>                |                |
| ....have used drugs to get stoned                     | 0.81           | .... care for environment                                 | 0.55           |
| ..... smoke cigarettes                                | 0.77           | .... help others in need                                  | 0.53           |
| ..... get drunk                                       | 0.74           | .... do well at school                                    | 0.51           |
| .... have sexual relationships                        | 0.64           | ....participate in organized sports activities with other | 0.49           |
|                                                       |                | .... participate in cultural activities other than sports | 0.45           |
|                                                       |                | .... get along with their parents                         | 0.43           |
| <b>Cronbach Alpha</b>                                 |                |                                                           |                |
| 0.56                                                  |                | 0.52                                                      |                |
| <b>Eigenvalue</b>                                     |                |                                                           |                |
| 2.82                                                  |                | 1.18                                                      |                |
| <b>Variance explained by two factors</b>              |                |                                                           |                |
| 36.3 %                                                |                |                                                           |                |

Note:

- 1) The item ‘Most of the friends in my group carry weapon’ was excluded from further analysis because it did not load to any factor
- 2) Loadings were not identical but similar enough to justify the use of similar weights
